# Supplementary material for: Synthesis of a controlled three-faced PAMAM particle
Source: Royal Society of Chemistry journal article supplement (doi:10.1039/c1py00146a), 2011-01-01

## Supporting Information

### Synthesis of a Controlled PAMAM Three-faced Particle

*Mathieu Arseneault, Philippe Dufour, Isabelle Levesque and Jean-François Morin\**

Department of Chemistry and Centre de recherche sur les matériaux avancés (CERMA), 1045  
Ave de la Médecine, Université Laval, Québec, Canada G1V 0A6

jean-francois.morin@chm.ulaval.ca

#### Table of Contents

1. NMR spectra for compounds **2-12**.....p. S3
2. GPC profile for compound **12**.....p. S11
3. ESI HRMS profiles for compounds **9, 10** and **12**.....p. S12

#### 1. NMR Spectra for compounds **2-12**

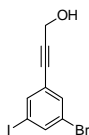

**2**

SpinWorks 2.5: ARM-1206-VII

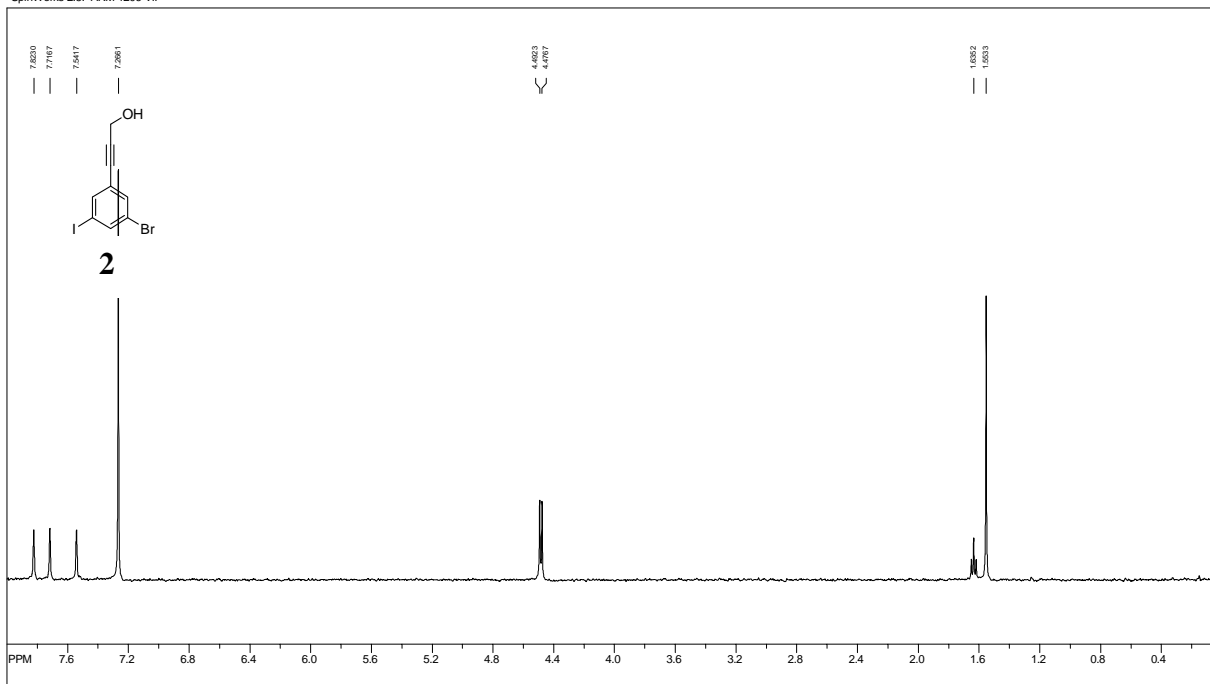

SpinWorks 2.5: ARM-1242-conc

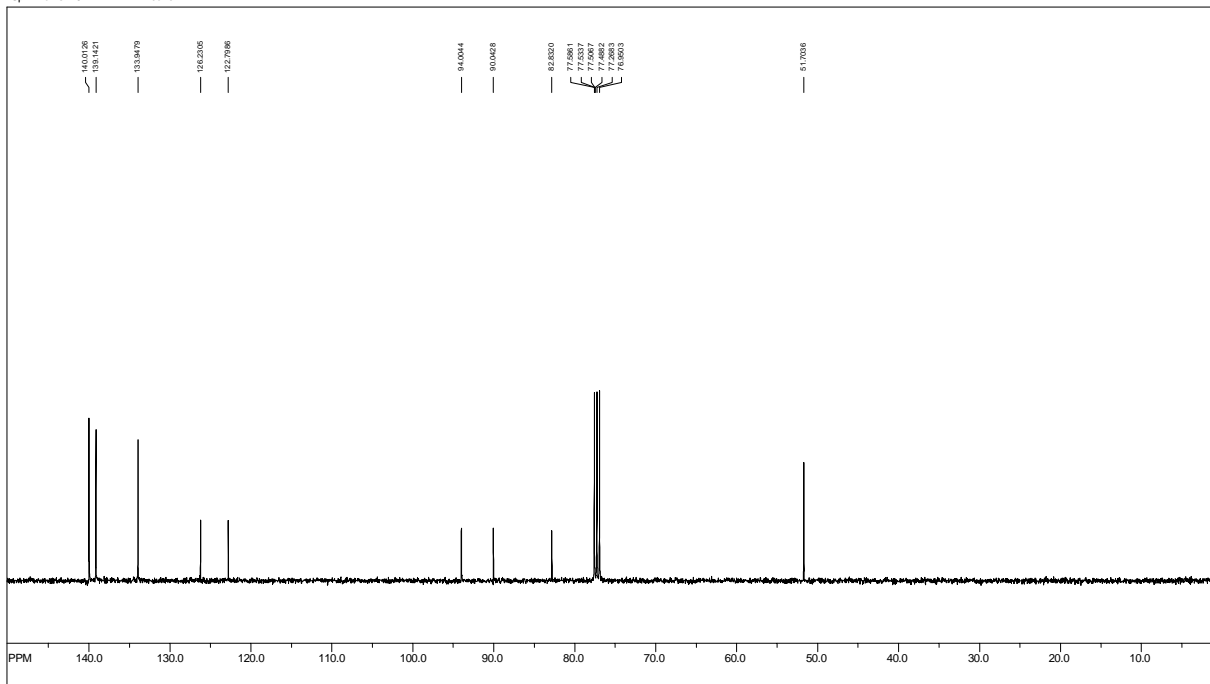

SpinWorks 2.5: ARM-1208-VII

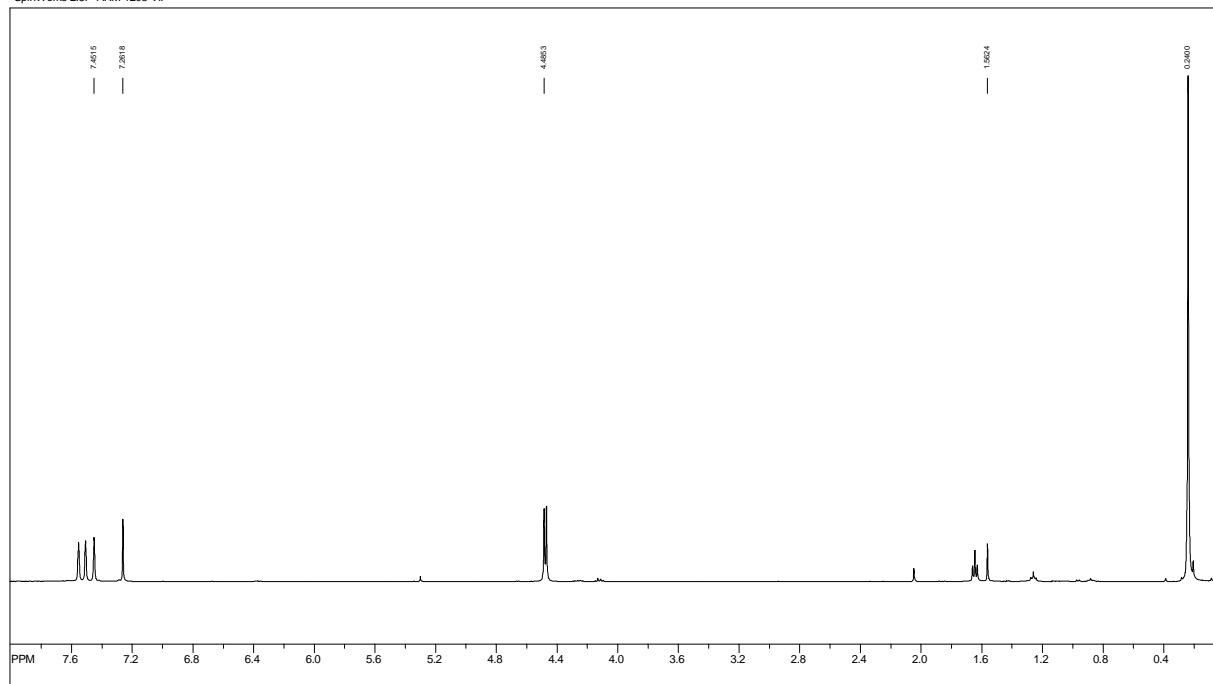

file: C:\travail\doctorat\NMR\ARM-1208-VII\_03\_jur2010\PROTON\_01.fid\data\_blocker 1 exp. 1.spr  
transmitter freq.: 309.770527 MHz  
time domain size: 47896 points  
width: 6396.42 Hz = 16.000012 ppm = 0.133548 Hz/pp  
number of scans: 8

freq. of 0 ppm: 399.773430 MHz  
processed size: 6558 complex points  
LB: 1.000 GB: 0.0000

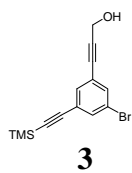

SpinWorks 2.5: ARM-1250-VII-carbonvrai

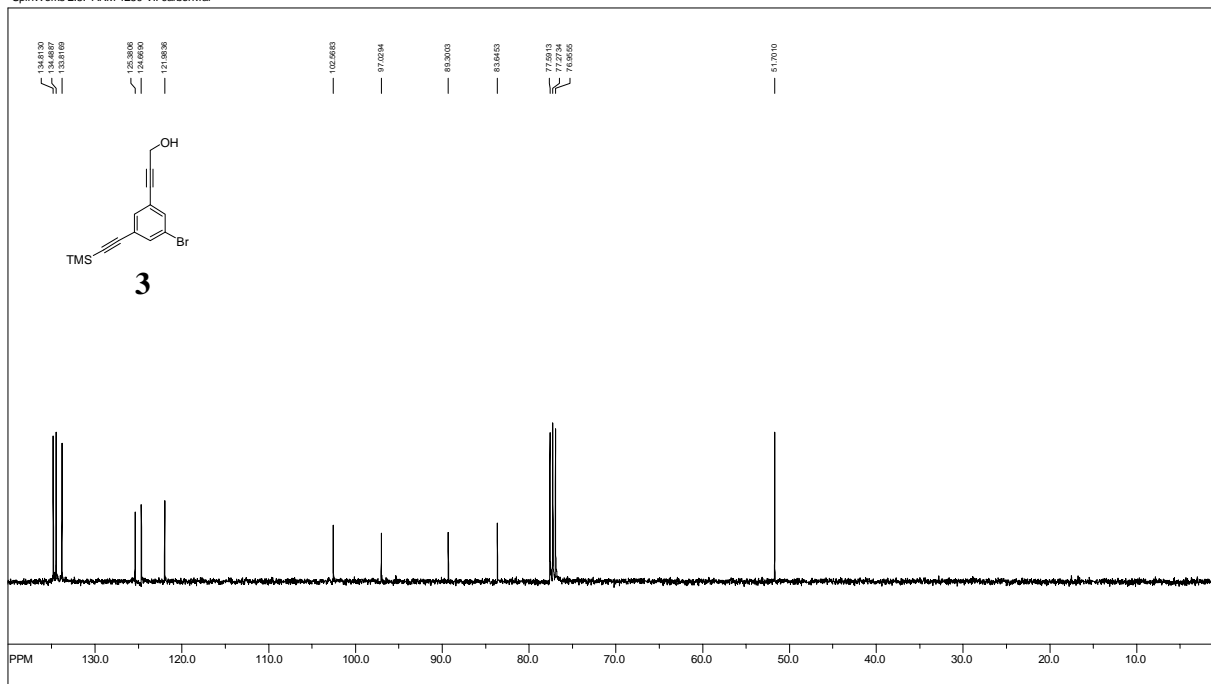

SpinWorks 2.5: ARM-1212-VII

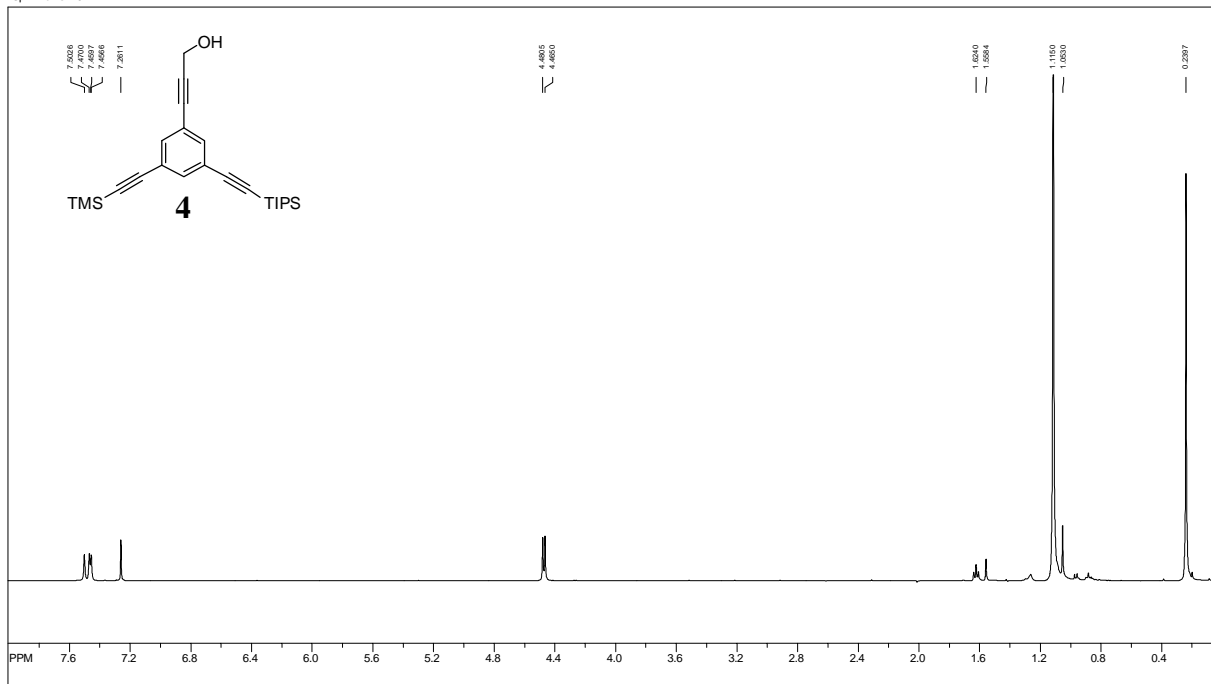

SpinWorks 2.5: ARM-1212-VII

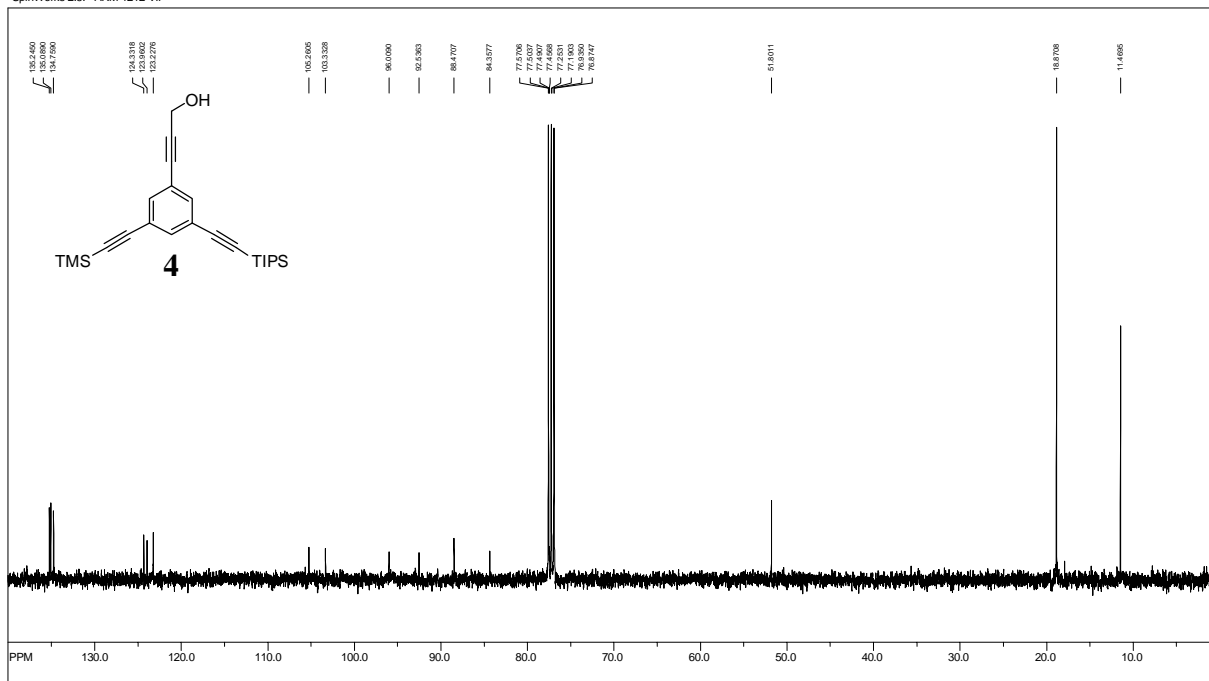

SpinWorks 2.5: ARM-1370-VIII

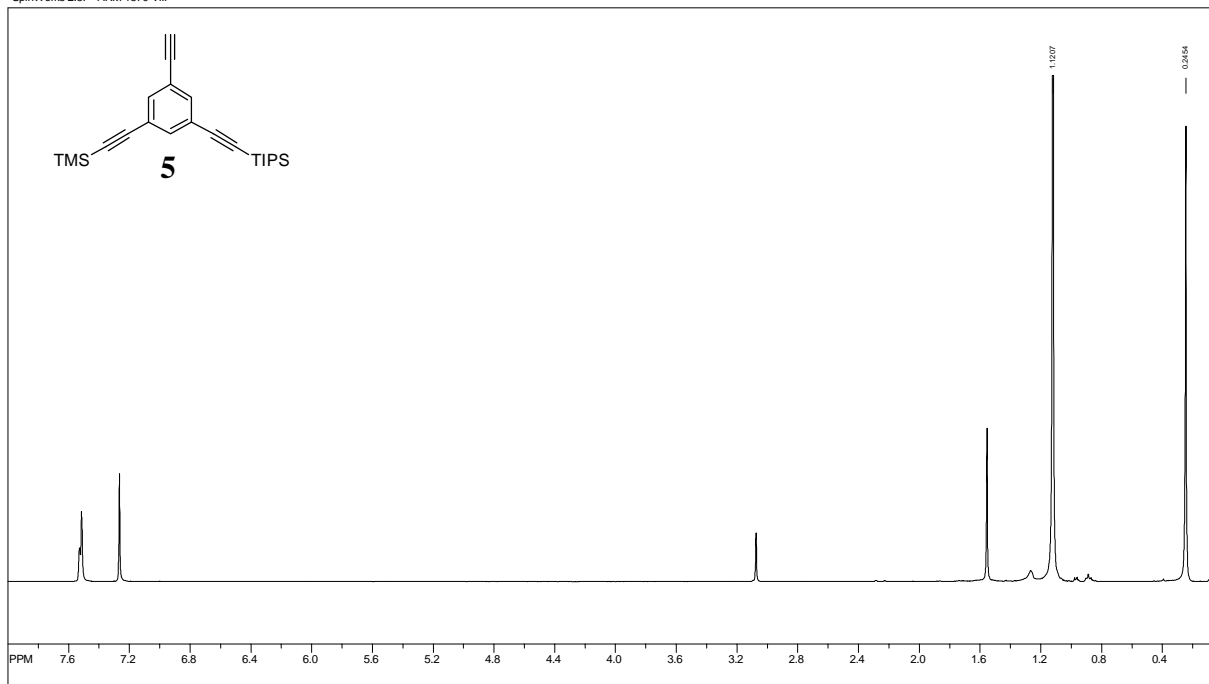



SpinWorks 2.5: ARM-1036-CDOD

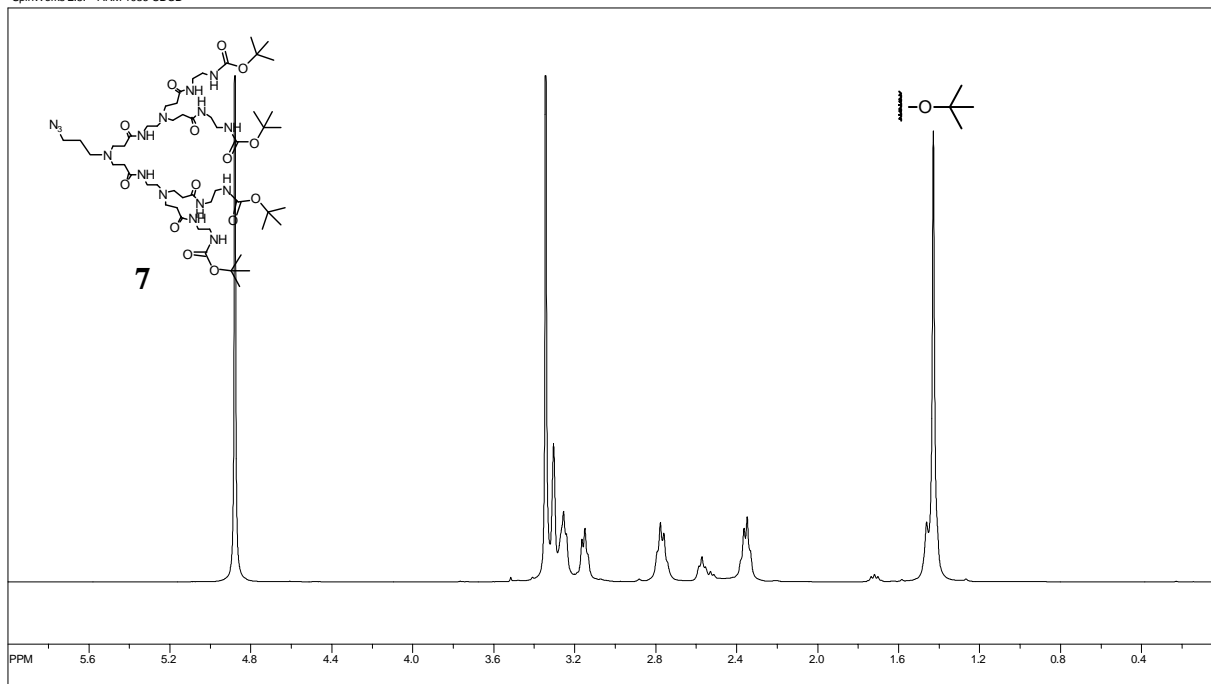

SpinWorks 2.5: ARM-1314-carbon-VIII

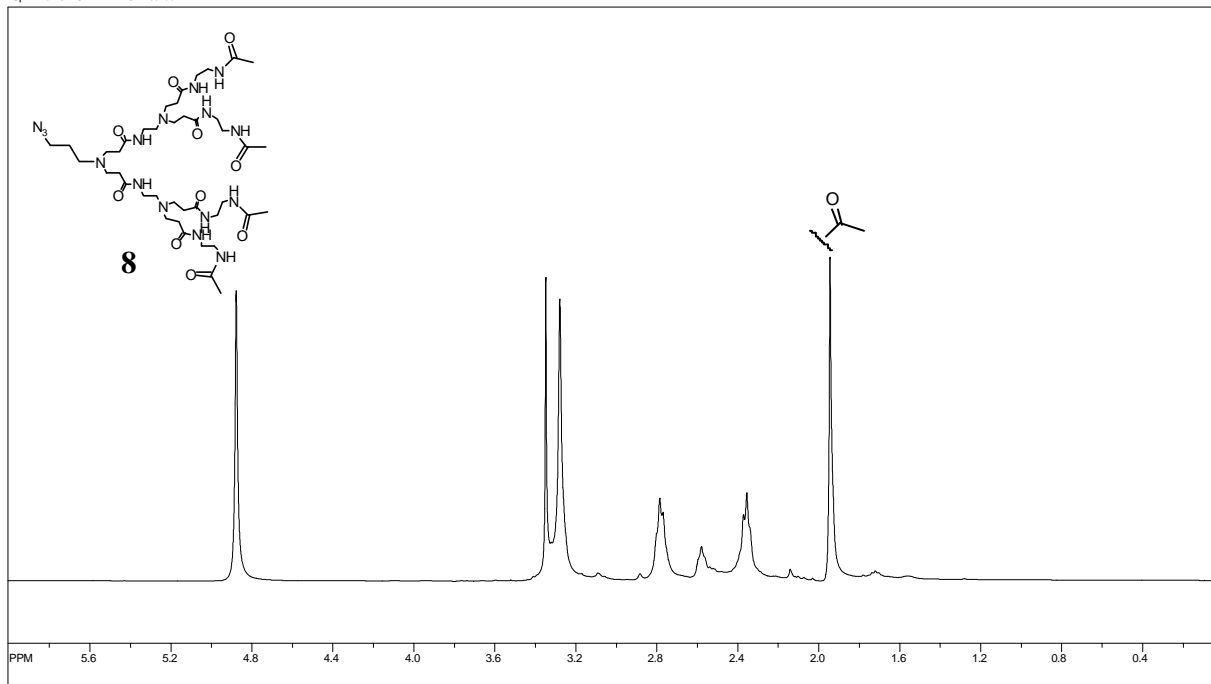

SpinWorks 2.5: ARM-1404-VIII

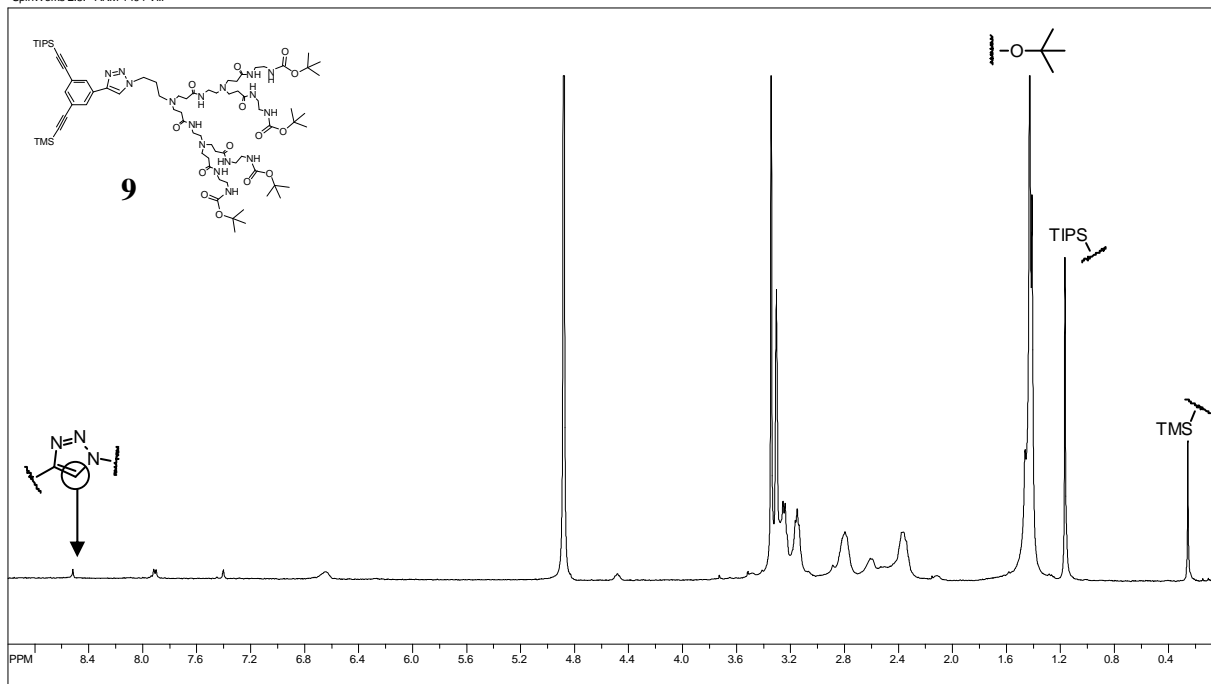

SpinWorks 2.5: ARM-1406-VIII

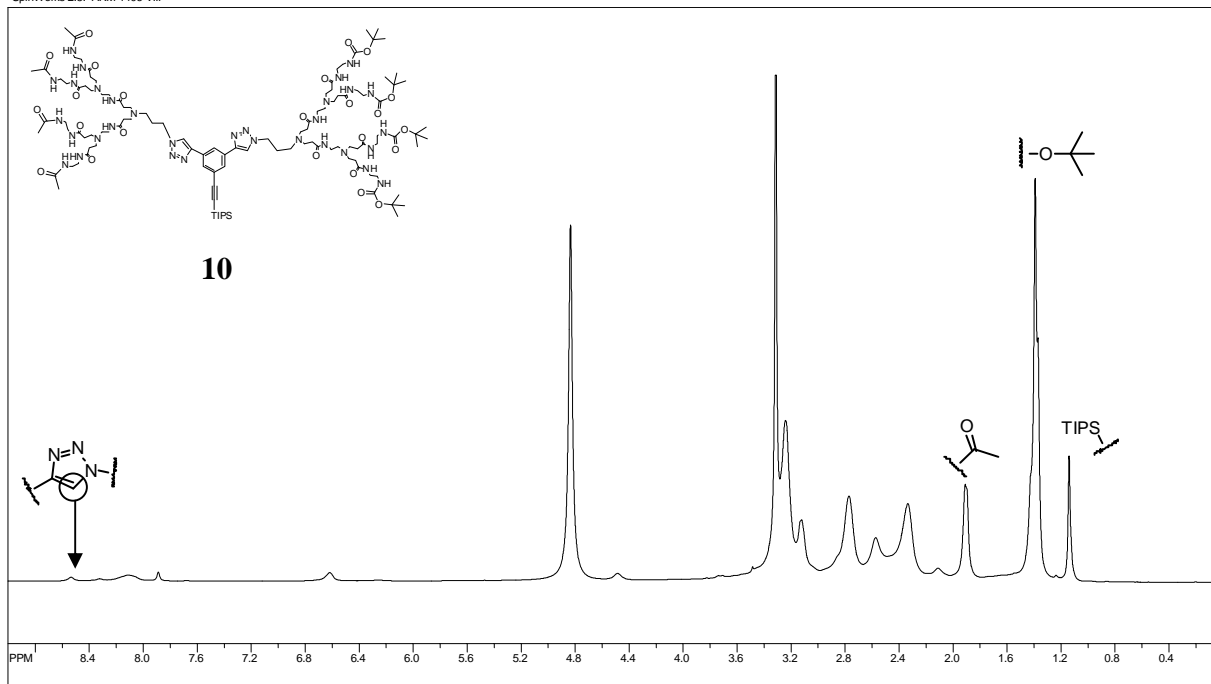



SpinWorks 2.5: ARM-1400-A-VIII

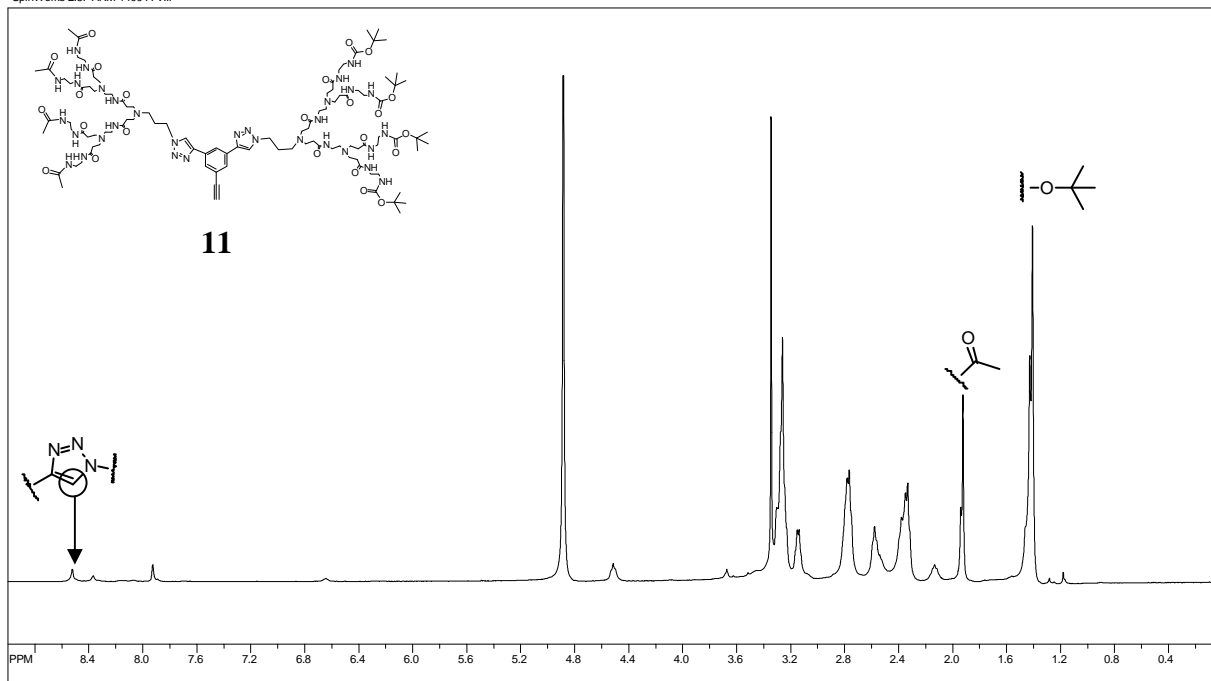

file: C:\travail\doctorat\NMR\ARM-1400-A-VIII\_28Oct2010\PROTON\_01.fid\data\_block1\_1 sept\_1dpu1  
transmitter freq.: 399.777416 MHz  
time domain size: 47856 points  
width: 6396.42 Hz = 15.999948 ppm = 0.133548 Hzpp  
number of scans: 8

freq. of 0 ppm: 399.775006 MHz  
processed size: 6538 complex points  
LB: 1.500 GB: 0.0000

SpinWorks 2.5: ARM-1402-VIII-a-HNMR

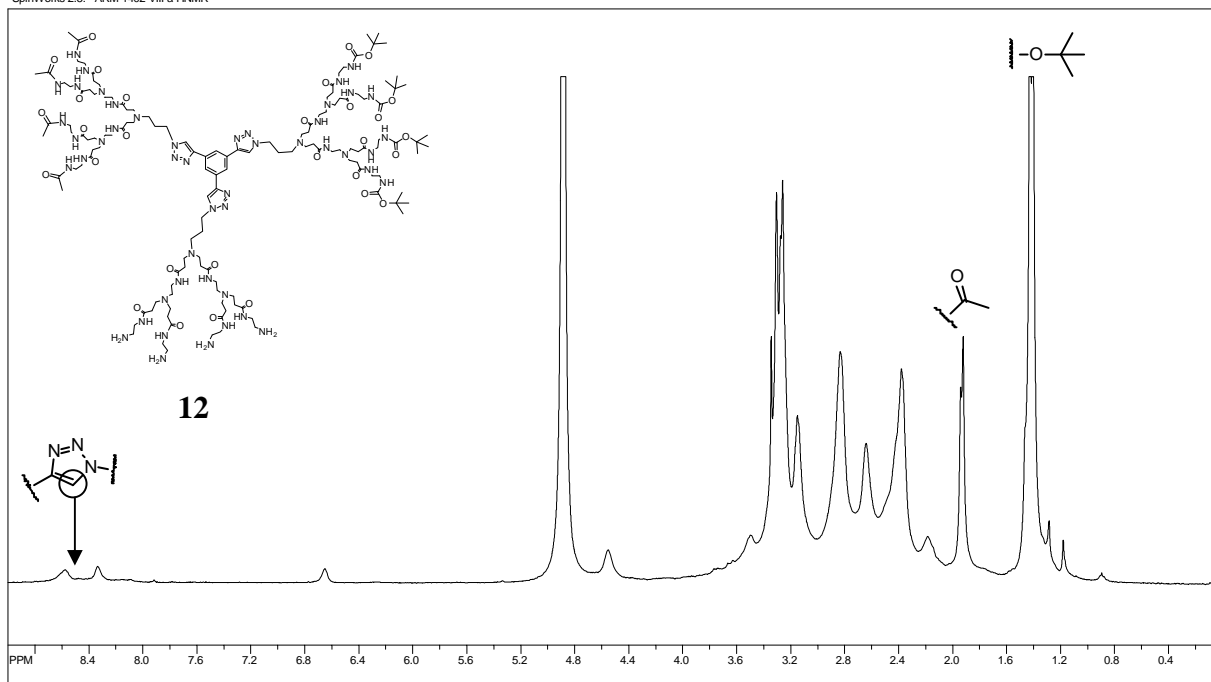

file: C:\travail\doctorat\NMR\ARM-1402-VIII-a-HNMR\_22Nov2010\PROTON\_01.fid\data\_block1\_1 sept\_1dpu1  
transmitter freq.: 399.777416 MHz  
time domain size: 47856 points  
width: 6396.42 Hz = 15.999948 ppm = 0.133548 Hzpp  
number of scans: 8

freq. of 0 ppm: 399.775006 MHz  
processed size: 6538 complex points  
LB: 0.000 GB: 0.0000

## 2. GPC profile for compound 12

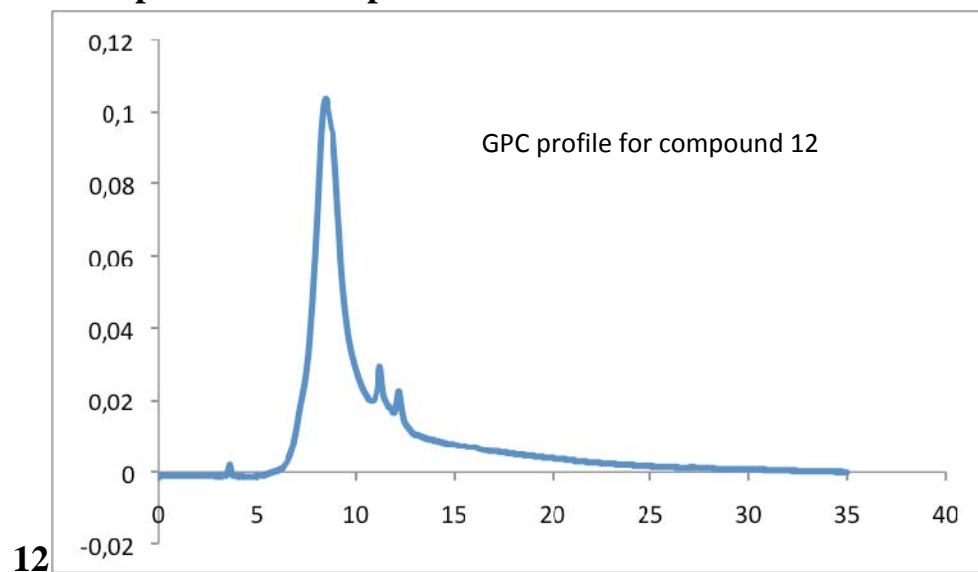

Supplement: c1py00146a.pdf [file c1py00146a.pdf]
